# Supplementary material for: Motor deficits and brain pathology in the Parkinson’s disease mouse model hA53Ttg
Source: Front Neurosci. 2024 Sep 20;18:1462041. doi: 10.3389/fnins.2024.1462041 (PMC11450652; doi:10.3389/fnins.2024.1462041)
Supplement: Supplementary file 1 [file Table_1.xlsx]

## Sheet: Figure 1
Figure 1A
Age in Months	ntg																								hA53Ttg
2	97	300	300	300	300	300	165	300	300	300	300	300	300	300	300	244	300	300	300	300	204	74	97		18	44	15	36	23	120	39	22	3	26	3	4	24	29	29	26	23	2	42	9	11	16	24	4
4	300	300	300	141	145	253	300	187	300	132	286	203	257	152	300	300	168	166	213	270	86	32	15	63	14	15	37	42	3	47	25	21	9	10	41	43	14	7	45	67	11	20	10	7	18	19	8	5
6	300	300	300	300	300	300	286	300	203	166	159	300	270	139	253	300	240	72	96	50	64	106	42	113	21	9	29	18	12	8	12	29	36	22	7	9	21	20	6	21	22	12	33	11	9	6	11	4*
Figure 1B
Age in Months	ntg																								hA53Ttg
2	6	2	2	3	1	1	4	6	5	0	1	1	1	0	3	0	1	1	0	3	0	0	2		21	55	32	12	9	26	39	14	24	12	13	13	5	11	15	37	3	21	11	7	8	24	12	25
4	1	0	0	1	1	2	5	1	6	2	5	0	1	1	3	1	1	1	0	2	3	0	12	0	18	33	37	36	36	30	42	43	20	6	32	20	39	42	8	10	28	55	10	51	31	24	28	32
6	1	0	0	0	0	2	1	2	0	1	1	1	0	0	2	0	4	3	0	1	1	3	1	2	27	18	47	30	37	53	40	28	13	32	57	41	40	49	42	26	27	57	31	77	38	39	74
Figure 1C
Age in Months	ntg																								hA53Ttg
2	5.8	5.4	7.32	5.4	8	5.92	7.24	9.76	8.95	6.8	4.16	5.12	5.2	5.32	5.56	6.32	6.24	4.32	5.52	4.68	6	5.72	8.12		8.96	17.36	13.64	14.24	12.92	14.72	15.84	13.7	18.48	16.19	14.04	11.72	6.48	10.24	11.52	13.36	8.16	10.55	11.04	7.48	11.68	16.91	9.4	14.32
4	5.16	4.6	7.2	5.14	10.72	6.12	11.45	10.08	9.68	5.84	6.36	5.28	7.96	9	6.92	5.68	12.99	10.27	6.97	6.66	8.52	10.62	13.28	6.6	14.56	16.16	19.12	18.71	15.08	14.17	21.37	17.76	15.08	7.48	17.84	12.6	15.28	17.32	12.32	13.2	19.79	20.45	17.03	24.4	19.57	15.03	17.42	18.01
6	5.44	7.52	5.36	5.84	5.96	4.56	5.88	6.52	6.04	7.4	5.16	6.24	4.84	5.89	6.8	7.36	8.16	7.92	7.32	7	5.84	8.92	7.08	9.84	17.36	15.39	22.56	15.4	20.12	23.65	17.68	22.84	14.07	20.36	18.71	17.52	23.12	18.87	18.6	16.72	15.54	19.72	15.25	24.38	18.84	16.64	20.8
*excluded

## Sheet: Figure 2
Figure 2B
Group	performers	non-performers
ntg 2 months	100	0
hA53Ttg 2 months	88	12
ntg 4 months	100	0
hA53Ttg 4 months	17	83
ntg 6 months	100	0
hA53Ttg 6 months	4	96

## Sheet: Figure 3
Figure 3A
Age in Months	ntg																								hA53Ttg
2	40.5	166.33	156	178.67	180	144.33	78	101.33	53.33	125	175	101	70.67	134.33	73.67	129	135.33	146	127	69.67	155.67	125	92		108.33	131.33	30	106	90.67	97.67	76.33	87.67	123.67	61.33	121.33	33.33	93.33	141.5	98.5	141.67	156.33	96.33	100.67	180	81.33	89.67	57.67	61.67
4	173.67	126.33	130.67	102	179.33	146.33	100	127.33	66	150.33	137.67	129.33	141.67	145	148.67	133.67	180	153.33	113.33	144	84.33	171.67	84	154	72.33	122.33	148.33	89.33	70.67	92	38.33	69.33	44	47	47	23	44.67	72.67	86	84.67	81	48.33	47.67	64.33	47	25.67	32.67	101.33
6	168.33	121.67	99	144	100.33	180.33	155.33	173.33	137.33	119.33	104.33	141	98	118.67	171.67	114.33	82.67	176.33	163.67	56	149.67	119.33	113	145	76.33	58	51.33	70.67	16.33	49.67	84.33	54.33	96.67	75.33	72.33	79.33	38	43.67	110.67	27.67	34	63	78.67	43	38.67	68	90.67	5*
Figure 3B
Age in Months	ntg																								hA53Ttg
2	4.43	3.57	4.67	1.63	4.17	2.63	8.67	5.43	1.63	2.11	5.5	4	4.17	22	2.2	4.57	4.8	8.25	2.78	4.4	13	3.29	5.33		20.5	1.5	1.4	1.75	9	4.8	1.88	2.17	1.88	2.5	2.57	2.63	6.2	1.88	4	3.17	5.6	7	2.83	2.5	1.9	2.3	3.33	4.14
4	3.14	3.5	2.71	12	20	14.67	14	7	1.18	4.5	6.8	2.71	4.14	2.2	4.83	12	1.89	2.56	4.86	9.6	8.5	3.5	2.88	7.2	3.14	4	5.6	11	6.5	1.67	5.4	2.5	1.75	4.67	2	2	2.33	1.71	5	3.29	1.86	2.25	3.57	1.63	1.86	1.44	2	1.88
6	4.29	2.89	3.29	9	9.25	2.88	4.43	3	1.8	4.71	4.57	2.86	2.67	6	3	2.88	3.38	6.4	12.67	2.63	5.33	2.5	2.63	4.83	1.88	3	2.78	4.14	2.17	2.33	2.63	1.33	2.5	1.88	1	1.44	2.83	2.71	1.6	1.09	3	1.5	3.4	2.5	3.25	1.86	1.17	1*
*excluded

## Sheet: Figure 4
Figure 4A
Age in Months	ntg								hA53Ttg
2	0.03	0.06	0.02	0.02	0.14	0.02	0.02	0.01	39.48	39.85	38.35	38.23	37.78	36.82	37.76	38.43
4	0.05	0.01	0	0.01	0	0.01	0.11	0.11	39.24	39.2	37.09	35.65	37.88	38.9	39.63	37.36
6	0.01	0.05	0.15	0.02	0.02	0.02	0.06	0.06	37.25	34.88	36.37	36.52	36.31	36.45	38.65	38.12
10	0.04	0.02	0.03	0.03	0.04	0.02		0.07	38.46	37.44	35.12	36.83	37.27	36.64	37.12	34.42	37.97
Figure 4B
Age in Months	ntg								hA53Ttg
2	0.13	0.18	0.12	0.25	0.25	0.18	0.12	0.14	36.19	36.83	35.25	35.32	35.9	33.88	35.26	34.83
4	0.1	0.08	0.03	0.11	0.02	0.1	0.29	0.57*	36.79	36.42	34.97	34.23	35.63	34.97	37.18	35.68
6	0.05	0.18	0.23	0.1	0.15	0.17	0.19	0.21	35.25	33.53	33.38	34.26	34.81	33.82	35.53	35.83
10	0.27	0.06	0.25	0.23	0.44	0.13		0.32	34.8	34.93	34.17	35.17	33.51	33.42	34.59	34.56	36.89
Figure 4C
Age in Months	ntg								hA53Ttg
2	0.07	0.54	0.21	0.3	1.13	0.2	0.12	0.18	33.58	33.12	32.31	34.37	33.17	33.03	31.3	32.09
4	0.44	0.49	0.04	1.61	0.03	0.09	0.41	0.3	33.19	34.11	33.38	31.9	34.17	35.62	34.64	34.05
6	0.84	0.59	0.44	0.31	0.52	0.27	0.33	0.3	33.02	30.97	31.87	31.22	33.05	33.38	34.48	33.38
10	0.78	0.26	0.26	0.21	0.21	0.31		1.65	34.22	35.07	30.12	32.74	31.53	31.23	30.98	33.32	31.6
Figure 4D
Age in Months	ntg								hA53Ttg
2	0.02	0.03	0.02	0.04	0.02	0.04	0.07	0.03	2.74	2.9	2.76	3.72	2.22	3.26	4.84	1.61
4	0.07	0.07	0.02	0.03	0.07	0.03	0.04	0.13	2.29	1.73	2.69	1.53	9.22	9.48	4.01	3.7
6	0.13	0.15	0.2	0.18	0.23	0.29	0.44	0.25	2.66	1.52	1.07	1.94	1.76	2.55	1.76	1.54
10	0.05	0.04	0.03	0.1	0.15	0.03		0.14	0.98	2.31	1.87	1.19	2.33	2.33	1.22	1.82	0.94
Figure 4E
Age in Months	ntg								hA53Ttg
2	0.11	0.08	0.06	0.15	0.03	0.11	0.1	0.1	1.83	1.51	1.65	1.47	1.21	1.77	3,05*	1.46
4	0.18	0.13	0.05	0.15	0.06	0.06	0.22	0.27	1.35	1.31	1.58	1.52	6.41	6.98	1.89	2.05
6	0.22	0.24	0.39	0.37	0.5	0.86	1.36	0.73	1.13	1.09	1.07	1.33	1.2	1.38	1.23	1.18
10	0.15	0.15	0.15	0.54	0.59	0.09		1.22	1.03	2.02	1.94	1.39	2.1	1.43	1.64	1.95	1.23
Figure 4F
Age in Months	ntg								hA53Ttg
2	0.03	0.13	0.18	0.11	0.07	0.04	0.03	0.03	0.36	0.31	0.18	0.43	0.31	0.17	0.66	0.3
4	0.06	0.2	0.01	0.03	0.01	0.11	0.1	0.13	0.13	0.1	0.08	0.11	2.52	3.19	0.22	0.45
6	0.27	0.52	0.6	0.47	0.44	0.39	0.68	0.42	0.99	0.44	0.4	0.44	0.58	0.62	0.54	0.31
10	0.2	0.15	0.14	0.13	0.32	0.14		0.47	0.4	0.27	2.45	4.68	11.1	11.18	5.51	0.77	6.08
*excluded

## Sheet: Figure 5
Figure 5A
Age in Months	ntg								hA53Ttg
2	0.32	0.36	0.29	0.27	0.34	0.3	0.25	0.26	0.32	0.33	0.26	0.23	0.26	0.3	0.39	0.36
4	0.55	0.45	0.34	0.32	0.43	0.48	0.64	0.57	0.47	0.49	0.55	0.36	0.46	0.59	0.48	0.46
6	0.4565	0.5519	0.511	0.5859	0.4292	0.402	0.5178	0.3815	0.4973	0.3543	0.3611	0.4156	0.436	0.4224	0.5723	0.4088
10	0.75	0.59	0.76	0.65	0.63	0.67		0.62	0.59	0.56	1.5	1.85	4.48	4.28	2.72	0.76	2.78
Figure 5B
Age in Months	ntg								hA53Ttg
2	2.31	1.48	1.17	1.59	1.51	1.63	2		1.7	1.57	1.2	1.38	1.41	1.9	1.95
4	1.9	1.65	1.55	1.85	1.11	1.48	0.92	1.51	1.57	1.12	1.05	1.16	1.98	1.22	1.78	1.48
6	1.4085	1.3023	1.5202	1.537	1.565	1.4867	1.7382	1.8388	1.6432	1.4476	1.3414	1.3805	1.2743	1.4811	1.5426	0.77*
10	1.73	1.38	1.63	1.41	1.19	1.68		1.69	1.85	1.7	2.43	3.12	5.69	5.23	4.19	1.81	4.27
*excluded

## Sheet: Figure 6
Figure 6A
Age in Months	ntg								hA53Ttg
2	1.6074	5.773	7.8558	9.9386	12.0214	39.0978	95.3334		12.0214	14.1042	14.1042	16.187	18.2698	28.6838	53.6774	68.257
4	5.773	5.773	16.187	18.2698	22.4354	26.601	47.429	55.7602	16.187	22.4354	24.5182	34.9322	45.3462	51.5946	70.3398	72.4226
6	9.9386	12.0214	20.3526	20.3526	24.5182	24.5182	47.429	168.231	26.601	26.601	37.015	62.0086	105.747	132.824	176.563	184.894
10	22.4354	26.601	32.8494	37.015	59.9258	66.1742	80.7538	84.9194	136.989	172.397	324.441	2257.28	3469.47	5241.93	6179.19	6275
Figure 6B
brainstem pS129	plasma NF-L
0.27	136.989
0.67	172.397
0.4	324.441
2.45	2257.28
4.68	3469.47
5.5	5241.93
11.1	6179.19
11.17	6275

## Sheet: Figure S1
Figure S1A
Age in Months	ntg																								hA53Ttg
2	5	4	4	6	2	3	2	6	4	2	3	0	0	0	4	1	1	3	0	7	5	10	0		29	68	45	29	28	34	71	26	25	61	36	27	36	17	37	40	10	48	18	4	33	38	33	39
4	0	2	1	2	3	2	36	7	24	6	2	10	3	2	2	6	10	11	1	4	7	6	33	10	91	67	0*	88	51	75	62	41	56	40	46	25	74	72	22	17	54	0*	9	119	48	43	44	53
6	5	1	11	3	2	11	3	18	17	27	15	5	1	4	4	0	6	2	11	17	9	7	23	25	74	159	0*	0*	64	0*	0*	0*	38	80	54	50	0*	82	0*	72	73	74	40	96	0*	42	108
Figure S1B
Age in Months	ntg																								hA53Ttg
2	0	1	0	0	0	0	0	0	0	0	0	0	0	0	1	0	0	0	0	1	0	0	0		4	2	0	3	1	5	3	2	4	4	1	1	0	3	2	1	0	1	0	3	0	0	0	1
4	1	1	0	0	0	0	1	0	2	0	0	0	0	0	2	0	0	0	0	0	0	0	1	0	9	2	16	8	4	0*	0*	0*	3	3	5	5	6	0*	2	0*	0	0*	0	1	1	2	2	5
6	1	0	0	0*	0	0	0	2	1	0	1	0	0	0	0	0	0	0	0	0	0	0	0	0	8	7	15	11	9	10	7	0*	7	0*	0*	6	9	2	0*	5	2	9	9	10	8	0*	0*
Figure S1C
Age in Months	ntg																								hA53Ttg
2	3	3	2	0	2	7	4	2	1	0	0	0	1	0	0	2	0	0	0	5	0	1	2		14	5	21	8	5	10	45	17	13	18	0*	5	8	13	6	7	4	5	6	3	6	1	6	11
4	1	4	0	4	0	3	6	2	15	7	3	1	1	0	7	2	1	2	1	0	0	1	4	6	16	12	15	44	7	43	0*	32	0*	0*	27	0*	29	45	10	6	2	0*	8	39	13	18	29	53
6	4	1	0	0	4	4	1	7	2	7	0	3	2	4	0	1	0	0*	4	2	1	1	1	1	37	37	56	0*	0*	0*	0*	0*	19	28	63	14	40	41	50	0*	19	43	41	0*	0*	20	44
Figure S1D
Age in Months	ntg																								hA53Ttg
2	1	3	5	3	23	5	7	5	1	4	1	2	0	4	1	0	1	0	8	1	1	3			0*	12	45	22	18	20	102	18	31	0*	36	31	7	21	0*	33	0	8	11	4	7	4	1	28
4	2	3	0	7	1	5	13	14	11	1	0	0	2	2	1	2	1	5	0	2	0	1	5	9	0*	36	0*	0*	0*	0*	0*	0*	0*	0*	0*	0*	0*	0*	29	0*	14	0*	0*	0*	0*	42	0*	0*
6	5	4	4	2	1	26	1	17	4	10	1	5	0	4	0	1	3	0	3	0	0	2	2	3	0*	0*	0*	0*	0*	0*	0*	0*	0*	0*	0*	39	0*	0*	0*	0*	0*	0*	0*	0*	0*	0*	0*
*excluded

## Sheet: Figure S2
Figure S2A
Age in Months	ntg																								hA53Ttg
2	5.4	6.08	6.64	7.76	9.64	7.12	6.48	7.56	8.56	7.2	4.76	6.52	4.92	6.24	6.12	7.4	5.24	6.04	5.36	6.44	11.72	7.4	6.97		13.56	17.88	14.72	14.52	14.68	12.8	15.96	13.92	17.48	20.32	15.21	12.16	16.4	13.64	15.65	14.48	9.44	14.56	9.84	8.6	16.44	16.16	12	16.44
4	4.64	5.04	6.04	6.04	9.08	5.72	13.88	9.08	12	7.6	6.28	10.4	9.28	8.88	7.15	8.52	12.76	11.4	4.96	7.88	9.47	8.31	15.89	9.87	19.72	19.6	0*	20.72	14.4	19.25	17.82	18.79	24.41	16.56	18.51	15.52	18.4	20.33	15.56	16.44	20.11	0*	17.37	32.23	21	15.87	17.09	16.61
6	8.08	10.08	7.48	7.36	6.24	8	7.56	10.83	8.4	15.12	10.24	6.68	5.04	5.4	10.16	6.36	10.48	8.12	10	14.52	4.32	11.65	12.95	17.22	19.92	21.56	0*	0*	21.16	0*	0*	0*	18.36	23.44	19.19	20.16	0*	19.78	0*	21.04	15.35	21	17	21.86	0*	17.92	21.68
Figure S2B
Age in Months	ntg																								hA53Ttg
2	4.24	3.8	3.68	3.32	4.88	5.12	4.36	4	4.16	3.88	3.76	3.44	3.48	3.88	4.12	5.29	4.16	3.2	4	4.44	4.28	5.44	4.67		7.4	5.8	6.84	7.04	7.16	6.08	5.56	7.64	10.81	9.63	7.92	5.88	5.44	5.68	5.88	4.92	4.88	5.84	5	5.32	5.32	5.32	5	8
4	4.16	4.16	5.64	4.56	5	5.52	6.12	5.08	5.96	3.65	3.84	4.48	4.68	6.12	5.04	5.36	7.18	5	3.8	4.84	4.72	6.19	6.48	4.78	8.52	7.84	15.99	11.72	7.2	0*	0*	0*	8.76	6.96	8.84	8.12	9.94	0*	7.04	0*	6.98	0*	6.92	13.32	8.18	8.98	7.62	11.21
6	4.24	6.68	4.12	0*	4.76	4.08	4.32	4.52	4.72	5.08	5.12	4	3.68	4.36	6.52	4.12	4.56	6.88	5.04	7.24	5.57	7.6	5	6.32	10.4	9.8	12.92	13.22	16.12	12.29	12.56	0*	13.48	0*	0*	8.24	16.93	8.21	0*	7.52	6.28	13.15	9.8	11.76	11.88	0*	0*
Figure S2C
Age in Months	ntg																								hA53Ttg
2	4.24	4.68	4.96	3.76	6.08	7.64	5.4	4.72	4.04	3.88	3.96	3.8	3.2	5.04	3.6	5.88	4.76	3.2	4.65	5.12	5.08	4.36	5.64		11.2	7.59	13.71	9.6	9.92	9.56	15.72	11.6	13.2	13.56	0*	7.44	7.32	9.4	7.84	6.67	6	6.72	5.84	6.02	7.68	7.36	7.4	8.44
4	4.04	5.04	6	7.05	4.4	6.12	9.3	4.68	11.34	7.28	4.92	5.16	5.2	6.88	6.12	5.4	9.53	6.28	5.1	4.65	5.33	5.25	7.17	7.61	11.64	11.64	16	18.64	9	14.83	0*	15.92	0*	0*	13.92	0*	14.8	17.18	11.92	12.52	7.07	0*	13.16	21.76	12.16	12.21	16.33	0*
6	7.04	7.16	4.24	5.32	6.92	6.32	5.12	7	4.96	8.6	5.44	4.84	4.56	5.28	6.12	4.4	4.54	0*	5.36	7.13	3	6.92	5.08	6.73	17.08	20.88	19.32	0*	0*	0*	0*	0*	16.72	17.49	16.6	11.4	21.18	17.73	25.42	0*	13.16	20.29	16.28	0*	0*	17.04	16.16
Figure S2D
Age in Months	ntg																								hA53Ttg
2	7.48	4.68	7.28	5.12	7.56	14.68	6.84	6.4	5.68	5.36	5.76	5.52	3.76	7.04	6.49	6.04	6.04	4.72	5.04	5.96	6.44	6.64	6.96		0*	11.56	15	14.28	14.12	11.44	18.76	13.56	18.68	0*	17.12	15.52	8.08	12.12	0*	14.88	6.28	7.96	7.24	7.52	8.52	8.36	8.6	14.78
4	4.16	5.12	8.32	8.8	4.68	6.72	10.88	7.84	11.6	5.08	6.44	5.6	6.04	8.52	8.2	9.12	9.78	8.66	4.81	6.66	6.04	6.87	8.37	9.32	0*	19.4	0*	0*	0*	0*	0*	0*	0*	0*	0*	0*	0*	0*	12.88	0*	12.29	0*	0*	0*	0*	21.5	0*	0*
6	9.36	9.68	6.92	6.84	5.24	9.52	4.92	10.89	6	10.84	8.68	7.04	4.88	6.97	8.76	5.44	5.52	8.44	7.17	6.56	5.44	9.64	5.9	8.52	0*	0*	0*	0*	0*	0*	0*	0*	0*	0*	0*	16.4	0*	0*	0*	0*	0*	0*	0*	0*	0*	0*	0*
*excluded

## Sheet: Figure S3
Figure S3A
Age in Months	ntg								hA53Ttg
2	40.69	39.86	40	40.38	41.25	40.94	38.67	38.73	39.27	40.09	37.85	38.51	41.97	41.27	41.44	40.31
4	43.02	40.94	41.39	41.68	41.38	42.23	43.58	42.67	42.26	42.64	43.49	40.18	42.12	42.83	41.76	44.73
6	43.012	42.403	42.113	42.656	42.385	40.073	42.909	42.9	44.369	41.224	39.96	41.795	42.244	41.159	43.826	41.43
10	45.94	46.39	45.25	44.96	43.44	44.37		42.85	45.86	46.37	52.94	54.11	66.39	64.75	59	46.67	57.94
Figure S3B
Age in Months	ntg								hA53Ttg
2	653.86	655.07	637.8	624.91	631.98	623.55	606.93	616.69	618.61	664.19	637.03	620.74	652.94	612.24	647.78	652.59
4	674.07	688.92	595.17	587.75	653.55	649.36	678.06	643.97	649.79	658.9	670.55	613.06	679.68	655.89	683.85	667.89
6	649.02	643.35	667.73	662.11	650.72	652.2	660.74	623.31	638.83	621.83	648.58	641.7	654.1	635.54	642.18	662.63
10	663.43	661.1	664.29	678.48	654.72	675.06		781.01*	690.52	631.12	677.11	711.05	729.13	739.89	758.32	688.93	733.1
Figure S3C
Age in Months	ntg								hA53Ttg
2	77.25	90.81	72.53	66.31	83.07	73.72	64.54	66.85	80.63	81.79	69.59	57.72	62.3	72.22	92.34	87.33
4	126.85	108.6	81.13	76.19	102.23	113.93	146.41	134.07	111.77	115.08	125.98	87.01	109.06	139.08	114.75	102.82
6	104.72	125.42	118.5	133.86	100.08	98.309	118.08	89.178	108.92	84.566	88.079	97.209	101.6	100.37	126.08	97.309
10	161.51	125.46	167.74	144.48	142.12	149.09		142.06	129.05	119.58	272.66	334.34	671.97	658.51	456.41	160.7	469.87
*excluded

## Sheet: Figure S4
Figure S4A
Age in Months	ntg								hA53Ttg
2	0.51	0.55	0.56	0.48	0.59	0.55	0.45	0.55	0.57	0.6	0.56	0.45	0.5	0.52	0.65	0.56
4	0.7	0.62	0.48	0.51	0.59	0.58	0.79	0.78	0.65	0.56	0.54	0.47	0.66	0.7	0.69	0.61
6	0.5973	0.7412	0.7772	0.6549	0.5541	0.5613	0.5685	0.5253	0.5253	0.5469	0.511	0.5757	0.5829	0.5685	0.7053*	0.5325
10	0.82	0.6	0.8	0.61	0.68	0.72		0.77	0.61	0.88	0.67	0.66	0.77	0.74	0.68	0.73	0.65
Figure S4B
Age in Months	ntg								hA53Ttg
2	122.22	136.84	136.05	123.16	138.39	133.23	111.38	135.33	141.04	139.62	131.9	109.55	114.82	122.83	152.28	134.48
4	155.79	140.68	111.67	119.08	131.9	132.86	167.26	164.68	147.21	129.7	124.15	109.64	143.73	154.06	145.46	137.59
6	132.98	162.1	173.86	151.29	128.09	132.52	127.42	119.47	122.74	128.35	118.45	134.19	134.6	130.02	159,07*	124.62
10	170.33	131.7	167.51	133	148.68	157.39		168.82	131.86	176.86	143.38	144.77	164.79	162.2	145.99	157.26	145.25
Figure S4C
Age in Months	ntg								hA53Ttg
2	0.51	0.67	0.55	0.49	0.61	0.57	0.48	0.58	0.56	0.49	0.58	0.4	0.53	0.71	0.66	0.58
4	0.75	0.68	0.45	0.51	0.66	0.68	0.81	0.69	1.39*	0.62	0.72	0.69	0.71	0.81	0.84	0.63
6	0.6821	0.8347	0.7719	0.7629	0.5565	0.5295	0.5565	0.5026	0.5385	0.5565	0.5475	0.6372	0.5744	0.5295	0.6103	0.5565
10	0.79	0.63	0.9	0.6	0.69	0.91		0.8	0.75	1.86*	0.73	0.63	0.7	0.73	0.56	0.56	0.58
Age in Months	ntg								hA53Ttg
2	116.79	153.19	127.74	118.6	138.66	133.96	112.56	134.93	132.57	115.54	132.09	97.19	116.51	155.03	148.17	137.88
4	163.85	148.14	99.75	115.2	144.83	151.97	173.06	152.57	292.89*	139.35	155.17	154.23	155.5	170.04	181.7	140.33
6	145.74	181.49	176.45	175.72	124.39	120.51	124.98	118.06	124.4	129.53	127.71	149.66	131.35	123.79	142.22	133.66
10	172.71	145.31	189.88	137.2	151.76	197.57		184.62	161.65	332.29*	157.93	145.73	151.39	162.01	131.57	131.11	137.21
*excluded

[truncated: 3 more sheets: Figure S5, Figure S6, Figure S7]
